# Supplementary material for: Why do RuO2 electrodes catalyze electrochemical CO2 reduction to methanol rather than methane or perhaps neither of those?
Source: Royal Society of Chemistry journal article supplement (doi:10.1039/d0sc01882a), 2020-01-01
Supplement: d0sc01882a1.pdf [file d0sc01882a1.pdf]

## Supporting Information

### Why RuO<sub>2</sub> electrodes catalyze electrochemical CO<sub>2</sub> reduction to methanol rather than methane; or perhaps neither of those?

Ebrahim Tayyebi<sup>1</sup>, Javed Hussain<sup>1</sup>, Egill Skúlason<sup>1,2,\*</sup>

<sup>1</sup>Science Institute, University of Iceland, VR-III, 107 Reykjavík, Iceland

<sup>2</sup>Faculty of Industrial Engineering, Mechanical Engineering and Computer Science, University of Iceland, VR-III, 107 Reykjavík, Iceland

\*Corresponding Author: [egillsk@hi.is](mailto:egillsk@hi.is)

Table S1. Recent experimental results for electrochemical CO<sub>2</sub> reduction reaction on RuO<sub>2</sub> and RuO<sub>2</sub>-based catalysts.

| Electrode                                                                                                               | CO <sub>2</sub> saturated electrolyte  | pH  | Potential (V)             | Time (min) | Faradic efficiency (%) |       |                |     |                 |
|-------------------------------------------------------------------------------------------------------------------------|----------------------------------------|-----|---------------------------|------------|------------------------|-------|----------------|-----|-----------------|
|                                                                                                                         |                                        |     |                           |            | CH <sub>3</sub> OH     | HCOOH | H <sub>2</sub> | CO  | CH <sub>4</sub> |
| RuO <sub>2</sub> (35)/TiO <sub>2</sub> (65) <sup>1</sup>                                                                | 0.05 M Hg <sub>2</sub> SO <sub>4</sub> | 1.2 | -0.15 vs RHE              | >2400      | 24                     | 2     | ---            | --- | ---             |
| Ag-doped RuO <sub>2</sub> (35) / TiO <sub>2</sub> (65) <sup>1</sup>                                                     | 0.05 M Hg <sub>2</sub> SO <sub>4</sub> | 1.2 | -0.15 vs RHE              | ---        | 2                      | 78    | ---            | --- | ---             |
| Rh <sub>2</sub> O <sub>3</sub> (20) / TiO <sub>2</sub> (80) <sup>1</sup>                                                | 0.05 M Hg <sub>2</sub> SO <sub>4</sub> | 1.2 | -0.15 vs RHE              | ---        | 5                      | ---   | ---            | --- | ---             |
| RuO <sub>2</sub> (25) / MoO <sub>2</sub> (30) / TiO <sub>2</sub> (45) <sup>1</sup>                                      | 0.05 M Hg <sub>2</sub> SO <sub>4</sub> | 1.2 | -0.15 vs RHE              | ---        | 12                     | <1    | ---            | --- | ---             |
| RuO <sub>2</sub> (20) / Co <sub>3</sub> O <sub>4</sub> (10) / SnO <sub>2</sub> (8) / TiO <sub>2</sub> (62) <sup>1</sup> | 0.05 M Hg <sub>2</sub> SO <sub>4</sub> | 1.2 | -0.15 vs RHE              | ---        | 7                      | 18    | ---            | --- | ---             |
| RuO <sub>2</sub> /TiO <sub>2</sub> <sup>1</sup>                                                                         | 0.2 M Na <sub>2</sub> SO <sub>4</sub>  | 4.0 | Water reduction potential | >2400      | 76                     | ---   | ---            | --- | ---             |

|                                                                          |                                        |            |                           |       |      |       |       |       |      |
|--------------------------------------------------------------------------|----------------------------------------|------------|---------------------------|-------|------|-------|-------|-------|------|
| RuO <sub>2</sub> /TiO <sub>2</sub> <sup>1</sup>                          | 0.2 M phosphate buffer                 | 5.2        | Water reduction potential | >2400 | 35   | ---   | ---   | ---   | ---  |
| RuO <sub>2</sub> /TiO <sub>2</sub> <sup>1</sup>                          | 0.5 M KHCO <sub>3</sub>                | 7.6        | Water reduction potential | >2400 | 5    | ---   | ---   | ---   | ---  |
| RuO <sub>2</sub> /TiO <sub>2</sub> <sup>1</sup>                          | 0.2 M Na <sub>2</sub> SO <sub>4</sub>  | 4.0        | Water reduction potential | >2400 | 53   | ---   | ---   | ---   | ---  |
| Cu-doped RuO <sub>2</sub> (75) / TiO <sub>2</sub> (25) <sup>2</sup>      | 0.5 M KHCO <sub>3</sub>                | 7.2 to 7.3 | -0.15 vs RHE              | ---   | 29.8 | 4.2   | ---   | ---   | ---  |
| RuO <sub>2</sub> <sup>3</sup>                                            | 0.5 M NaHCO <sub>3</sub>               | 8.3        | -0.15 vs RHE              | 480   | 17.2 | ---   | ---   | ---   | ---  |
| Cu-doped RuO <sub>2</sub> <sup>3</sup>                                   | 0.5 M NaHCO <sub>3</sub>               | 8.3        | -0.15 vs RHE              | 480   | 41.3 | ---   | ---   | ---   | ---  |
| Cd-doped RuO <sub>2</sub> <sup>3</sup>                                   | 0.5 M NaHCO <sub>3</sub>               | 8.3        | -0.15 vs RHE              | 480   | 38.2 | ---   | ---   | ---   | ---  |
| RuO <sub>2</sub> –coated boron doped diamond <sup>4</sup>                | 0.05 M Hg <sub>2</sub> SO <sub>4</sub> | 5.9        | 0.21 vs RHE               | 206   | 8.12 | 32.66 | 39.88 | 0.005 | 0.11 |
| RuO <sub>2</sub> –coated boron doped diamond <sup>4</sup>                | 0.05 M Hg <sub>2</sub> SO <sub>4</sub> | 7.3        | 0.09 vs RHE               | 356   | 4.77 | 37.45 | 44.85 | 0.003 | 0.12 |
| RuO <sub>2</sub> /TiO <sub>2</sub> nano particles composite <sup>5</sup> | 0.5 M NaHCO <sub>3</sub>               | 8.5        | -0.15 vs RHE              | 120   | 40.2 | ---   | ---   | ---   | ---  |
| RuO <sub>2</sub> /TiO <sub>2</sub> nano tubes composite <sup>5</sup>     | 0.5 M NaHCO <sub>3</sub>               | 8.5        | -0.15 vs RHE              | 120   | 60.5 | ---   | ---   | ---   | ---  |
| RuO <sub>2</sub> <sup>6</sup>                                            | 0.1 M KHCO <sub>3</sub>                | 6.8        | -0.50 vs RHE              | >900  | 0.00 | 0.00  | >95   | 0.00  | 0.00 |

|                                                                            |                            |     |                 |      |      |       |     |       |      |
|----------------------------------------------------------------------------|----------------------------|-----|-----------------|------|------|-------|-----|-------|------|
| RuO <sub>2</sub> <sup>6</sup>                                              | 0.1 M<br>KHCO <sub>3</sub> | 6.8 | -0.90 vs<br>RHE | >900 | 0.00 | <0.2  | >90 | 0.1<  | 0.00 |
| RuO <sub>2</sub><br>(50)/TiO <sub>2</sub><br>(50) <sup>6</sup>             | 0.1 M<br>KHCO <sub>3</sub> | 6.8 | -0.75 vs<br>RHE | >900 | 0.00 | 0.5<  | >95 | 0.5<  | 0.00 |
| RuO <sub>2</sub><br>(25)/TiO <sub>2</sub><br>(75) <sup>6</sup>             | 0.1 M<br>KHCO <sub>3</sub> | 6.8 | -0.75 vs<br>RHE | >900 | 0.00 | 0.00  | >90 | 1.00< | 0.00 |
| Cu-doped<br>RuO <sub>2</sub><br>(25)/TiO <sub>2</sub><br>(75) <sup>6</sup> | 0.1 M<br>KHCO <sub>3</sub> | 6.8 | -0.75 vs<br>RHE | >900 | 0.00 | 5.00< | 83< | 12.5< | 0.00 |
| RuO <sub>2</sub><br>(25)/SnO <sub>2</sub><br>(75) <sup>6</sup>             | 0.1 M<br>KHCO <sub>3</sub> | 6.8 | -1.00 vs<br>RHE | >900 | 0.00 | 3.00< | 95< | 2.00< | 0.00 |
| RuO <sub>2</sub><br>(10)/SnO <sub>2</sub><br>(90) <sup>6</sup>             | 0.1 M<br>KHCO <sub>3</sub> | 6.8 | -1.00 vs<br>RHE | >900 | 0.00 | 3.00< | 94< | 6.00< | 0.00 |

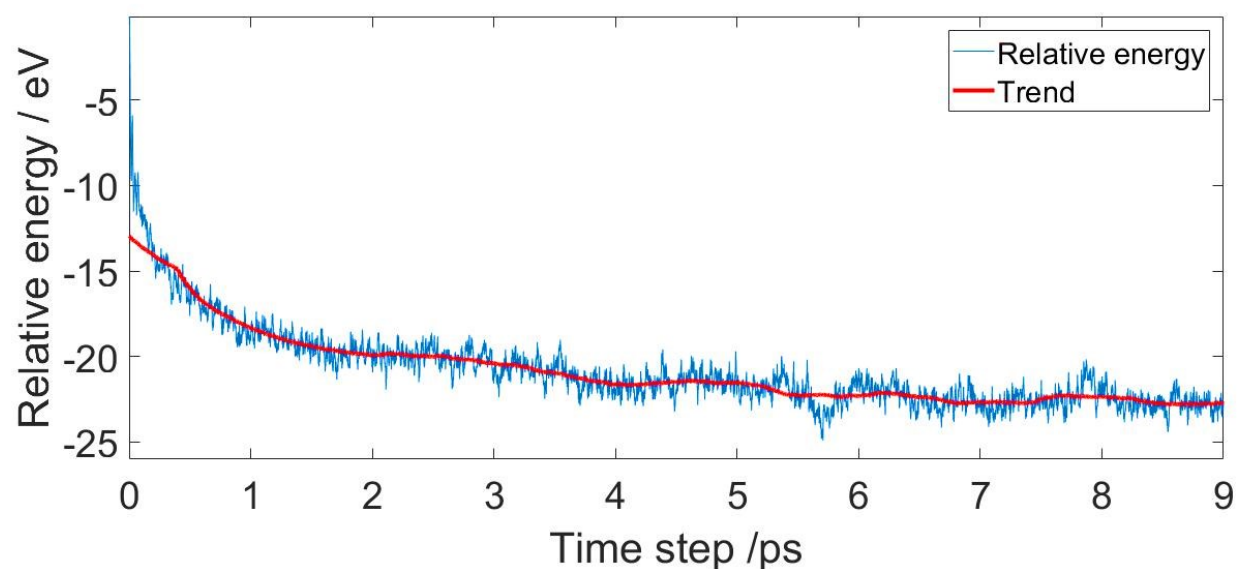

Figure S1: Relative energy as a function of elapsed time from *ab initio* molecular dynamic simulation at 300 K of 84 H<sub>2</sub>O molecules on top of a RuO<sub>2</sub>(110) surface.

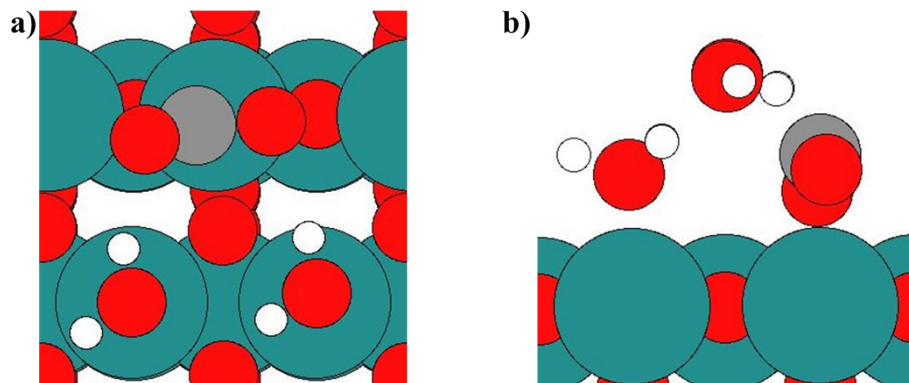

Figure S2. a) top view of O\*CO where the carbon atom binds to a bridge site and b) side view of \*OCO\* where two oxygen atoms bind to a bridge site and the adjacent CUS.

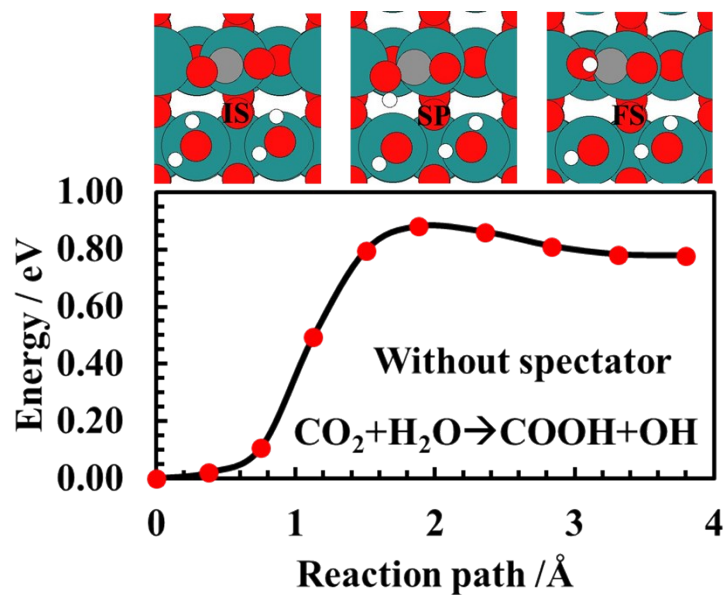

Figure S3. DFT calculated barrier for CO<sub>2</sub> protonation to COOH on RuO<sub>2</sub>(110) surface. Similar value for activation energy of CO<sub>2</sub> to COOH has been obtained on RuO<sub>2</sub>(110) when there is one CO as spectator on the surface (figure S2). (IS) initial state, (SP) saddle point and (FS) final state are shown on the top of the figure.

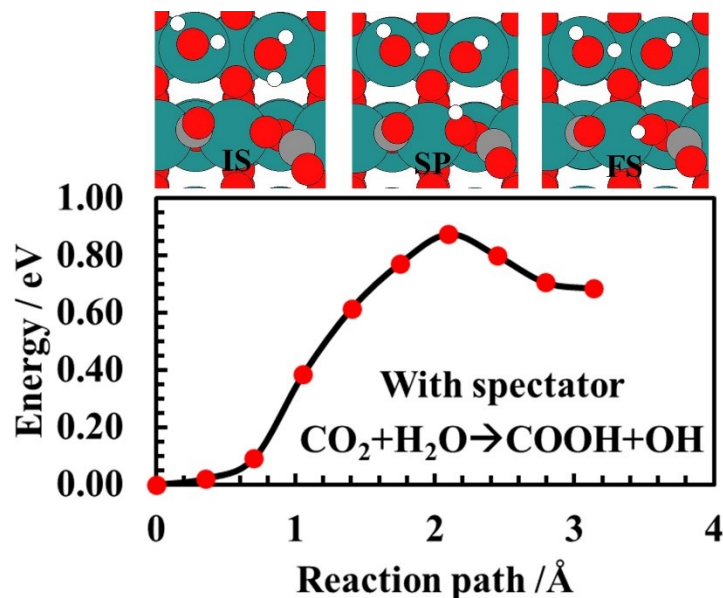

Figure S4. DFT calculated barrier for  $\text{CO}_2$  protonation to  $\text{COOH}$  on  $\text{RuO}_2(110)$  surface where CO spectator is included. (IS) initial state, (SP) saddle point and (FS) final state are shown on the top of the figure.

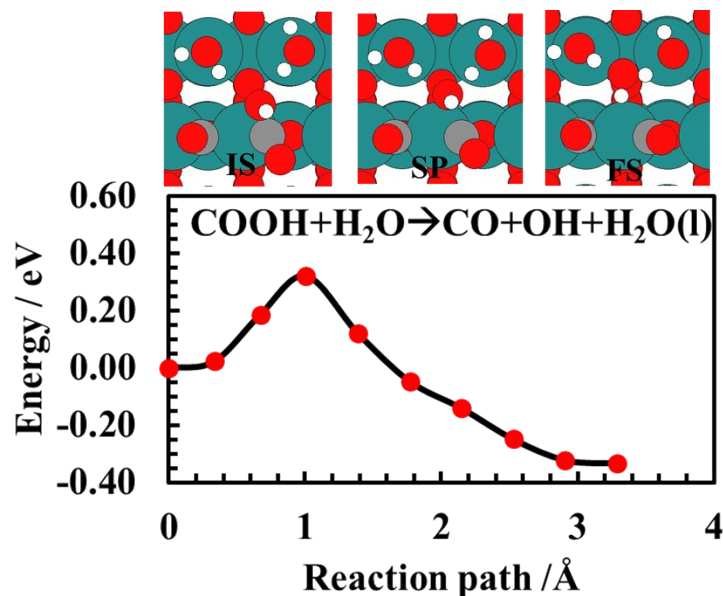

Figure S5. DFT calculated barrier for  $\text{COOH}$  protonation to  $\text{CO}$  and  $\text{H}_2\text{O}$  on  $\text{RuO}_2(110)$  surface. Similar value for activation energy is expected to be obtained on  $\text{RuO}_2(110)$  surface even without the presence of spectator. (IS) initial state, (SP) saddle point and (FS) final state are shown on the top of the figure.

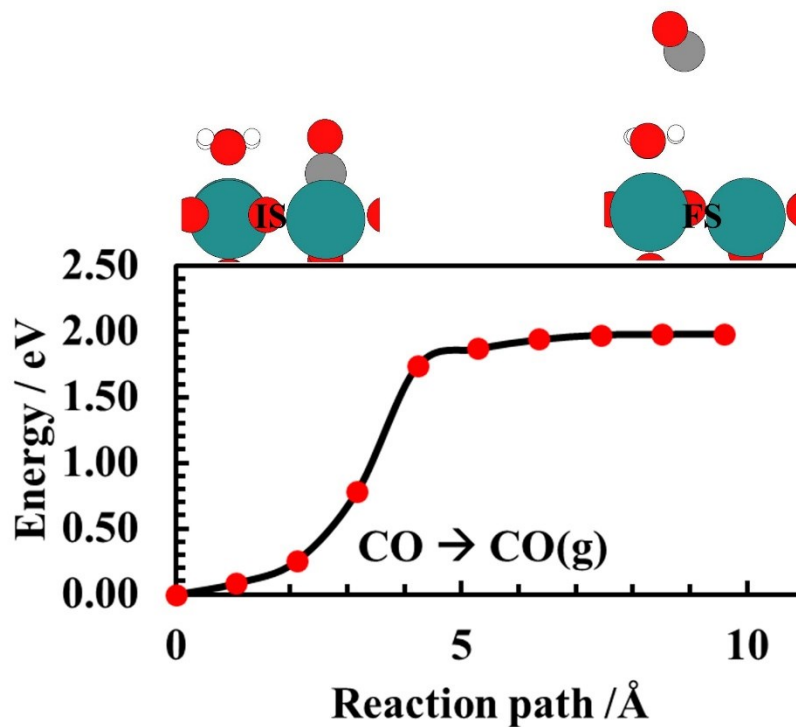

Figure S6. DFT calculated barrier for CO desorption on RuO<sub>2</sub>(110) surface. (IS) initial state and (FS) final state are shown on the top of the figure.

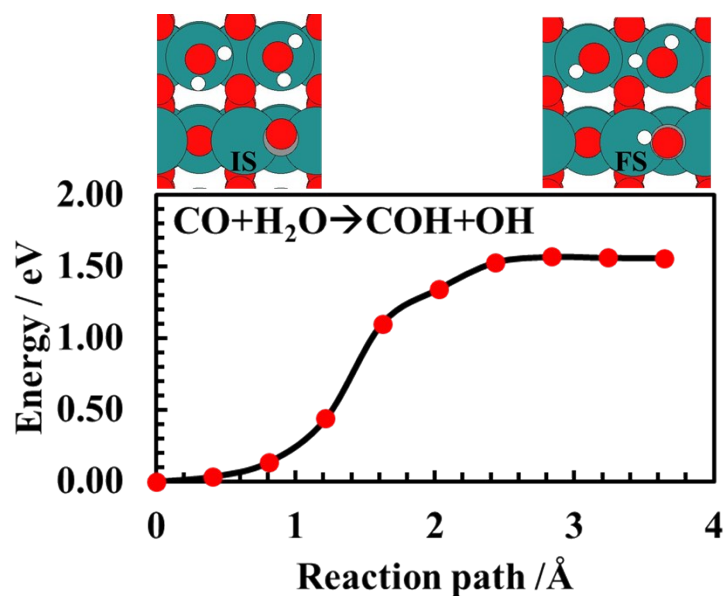

Figure S7. DFT calculated barrier for CO protonation to COH on RuO<sub>2</sub>(110) surface. (IS) initial state and (FS) final state are shown on the top of the figure. The proton is transferred to CO from the adjacent H<sub>2</sub>O molecule using a concerted Grotthuss mechanism of proton transfer from the next H<sub>2</sub>O molecule on the CUS.

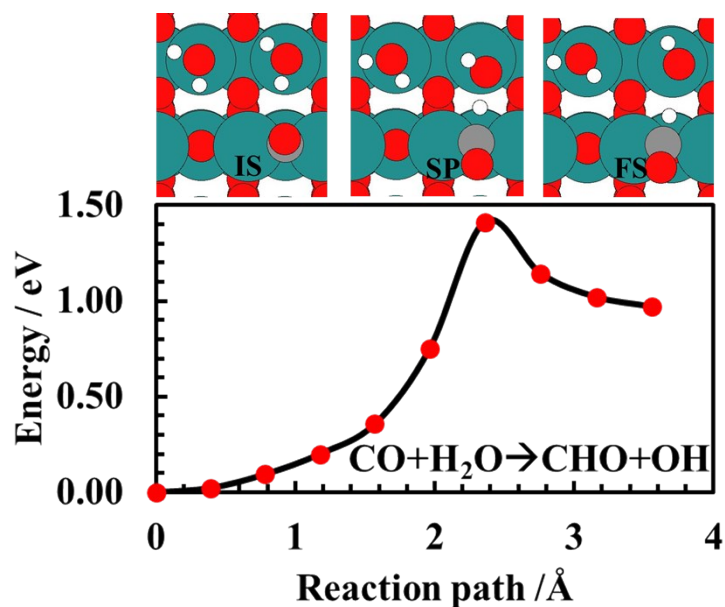

Figure S8. DFT calculated barrier for CO protonation to CHO on RuO<sub>2</sub>(110) surface. (IS) initial state, (SP) saddle point and (FS) final state are shown on the top of the figure.

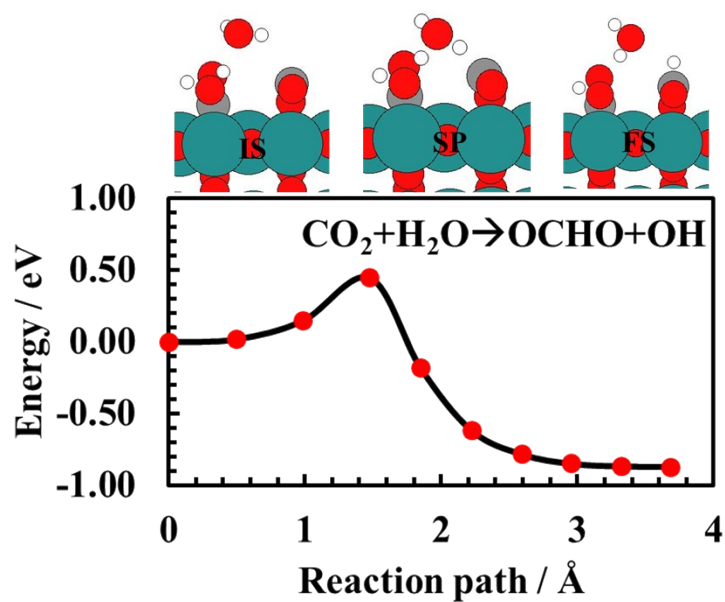

Figure S9. DFT calculated barrier for CO<sub>2</sub> protonation to OCHO<sub>b</sub> in a bidentate adsorption configuration on RuO<sub>2</sub>(110) surface. (IS) initial state, (SP) saddle point and (FS) final state are shown on the top of the figure.

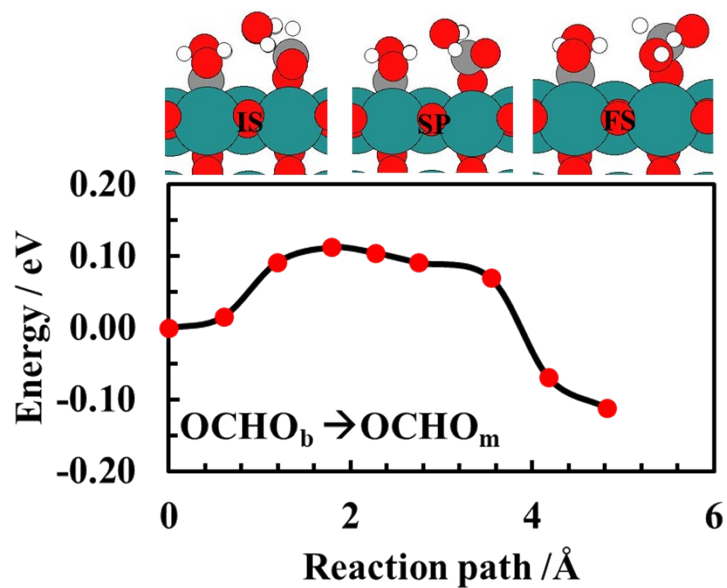

Figure S10. DFT calculated barrier for OCHO reconfiguration from bidentate configuration  $\text{OCHO}_b$  to monodentate configuration  $\text{OCHO}_m$  on  $\text{RuO}_2(110)$  surface. (IS) initial state, (SP) saddle point and (FS) final state are shown on the top of the figure.

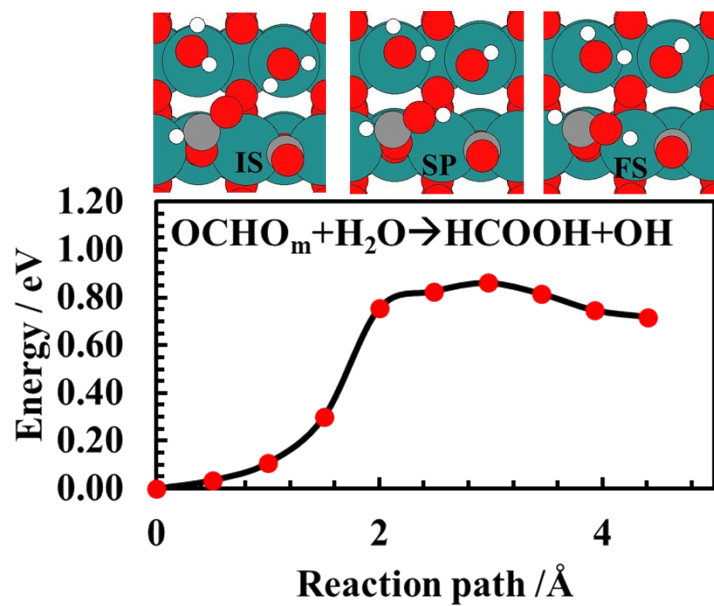

Figure S11. DFT calculated barrier for  $\text{OCHO}_m$  protonation to  $\text{HCOOH}$  on  $\text{RuO}_2(110)$  surface. (IS) initial state, (SP) saddle point and (FS) final state are shown on the top of the figure.



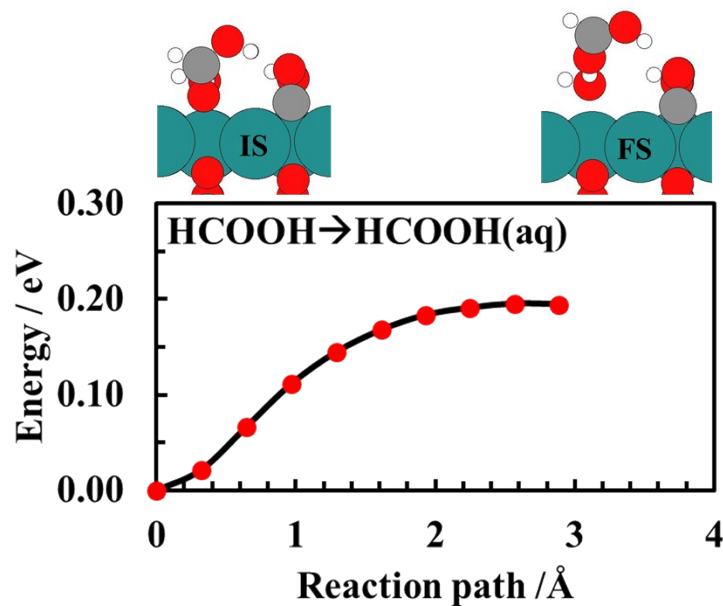

Figure S12. DFT calculated barrier for formic acid desorption on  $\text{RuO}_2(110)$  surface. (IS) initial state and (FS) final state are shown on the top of the figure.

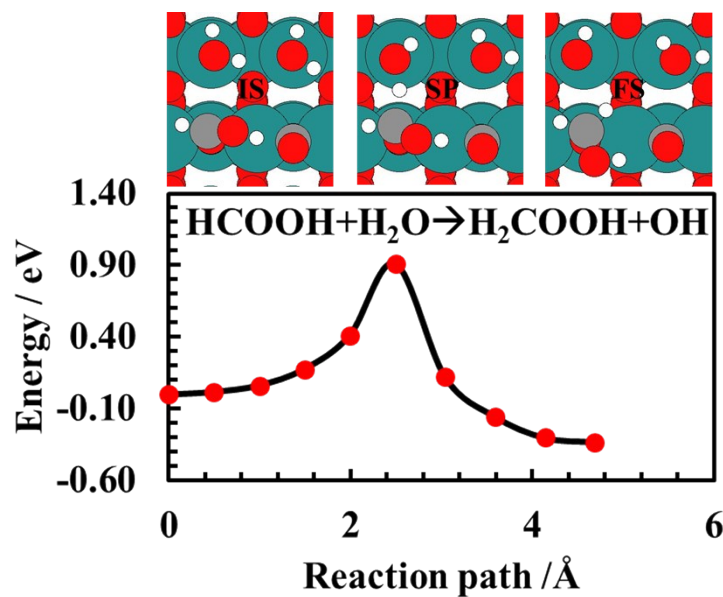

Figure S13. DFT calculated barrier for  $\text{HCOOH}$  protonation to  $\text{H}_2\text{COOH}$  on  $\text{RuO}_2(110)$  surface. (IS) initial state, (SP) saddle point and (FS) final state are shown on the top of the figure.

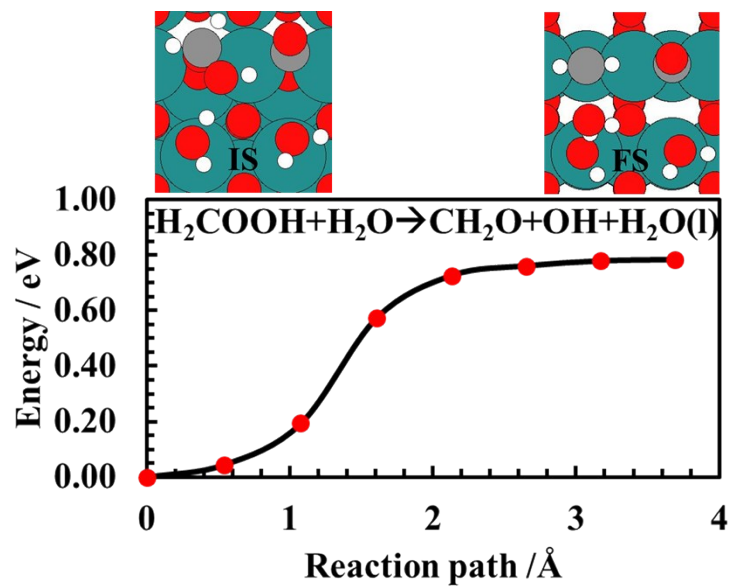

Figure S14. DFT calculated barrier for  $\text{H}_2\text{COOH}$  protonation to  $\text{CH}_2\text{O}$  and  $\text{H}_2\text{O}$  on  $\text{RuO}_2(110)$  surface. (IS) initial state and (FS) final state are shown on the top of the figure.

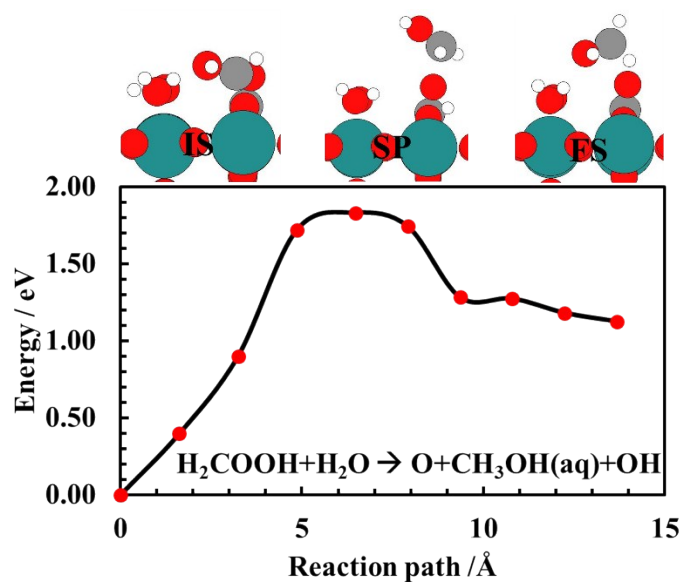

Figure S15. DFT calculated barrier for  $\text{H}_2\text{COOH}$  protonation to  $\text{H}_2\text{C}(\text{OH})_2$  on  $\text{RuO}_2(110)$  surface. (IS) initial state, (SP) saddle point and (FS) final state are shown on the top of the figure.

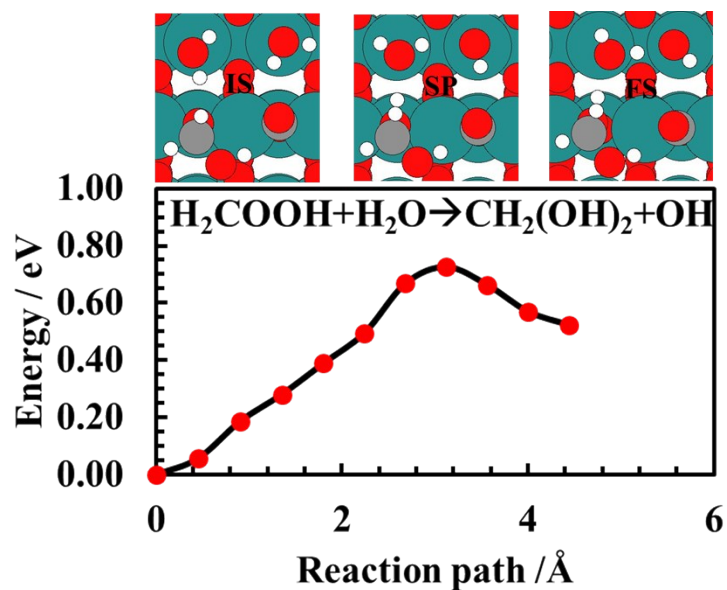

Figure S16. DFT calculated barrier for H<sub>2</sub>COOH protonation to H<sub>2</sub>C(OH)<sub>2</sub> on RuO<sub>2</sub>(110) surface. (IS) initial state, (SP) saddle point and (FS) final state are shown on the top of the figure.

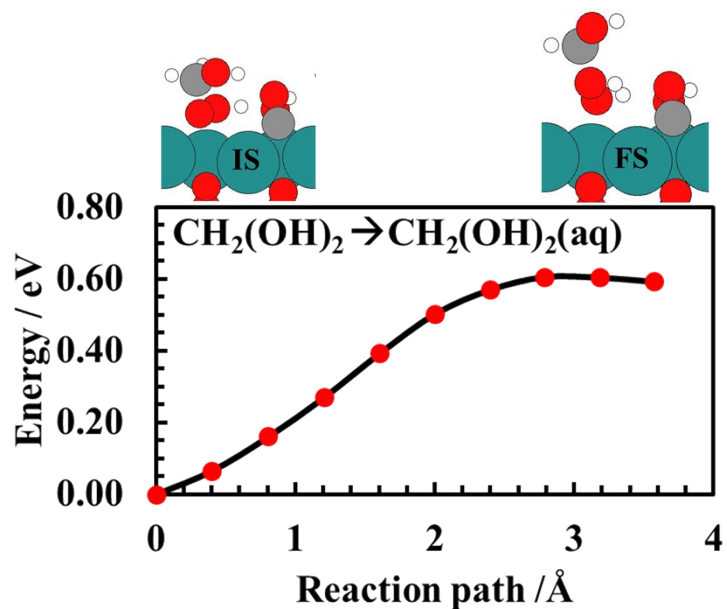

Figure S17. DFT calculated barrier for methanediol desorption on RuO<sub>2</sub>(110) surface. (IS) initial state and (FS) final state are shown on the top of the figure.

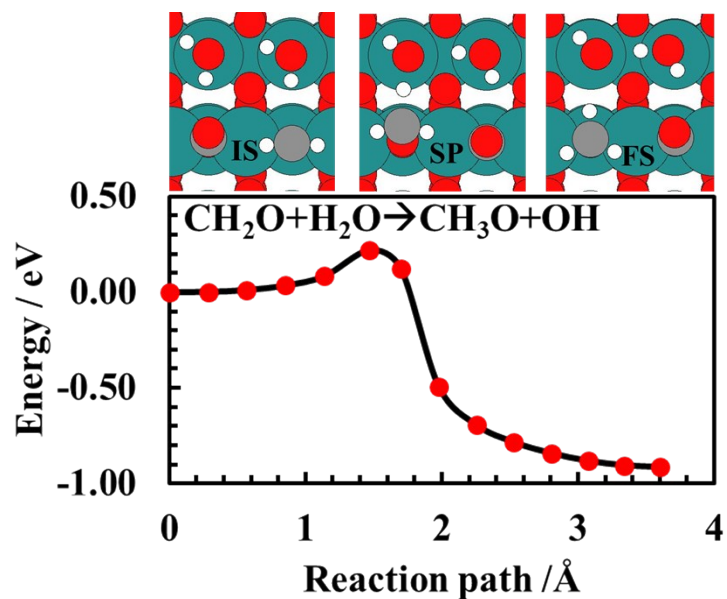

Figure S18. DFT calculated barrier for  $\text{CH}_2\text{O}$  protonation to  $\text{CH}_3\text{O}$  on  $\text{RuO}_2(110)$  surface. (IS) initial state, (SP) saddle point and (FS) final state are shown on the top of the figure.

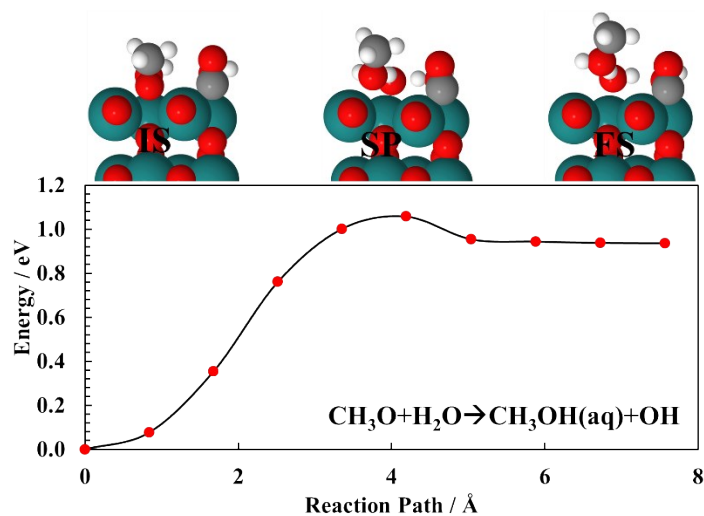

Figure S19. DFT calculated barrier for  $\text{CH}_3\text{O}$  protonation to  $\text{CH}_3\text{OH}(\text{aq})$  on  $\text{RuO}_2(110)$  surface. (IS) initial state, (SP) saddle point and (FS) final state are shown on the top of the figure.

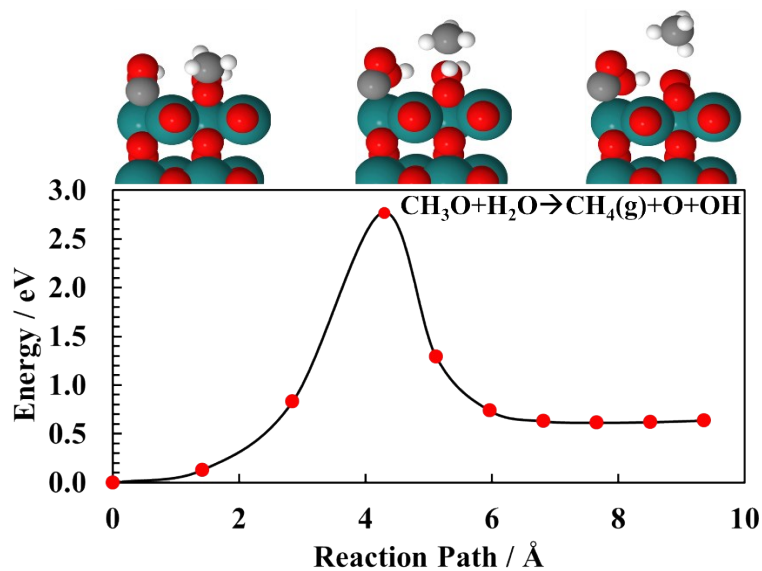

Figure S20. DFT calculated barrier for  $\text{CH}_3\text{O}$  protonation to  $\text{CH}_4(\text{g})$  on  $\text{RuO}_2(110)$  surface. (IS) initial state, (SP) saddle point and (FS) final state are shown on the top of the figure.

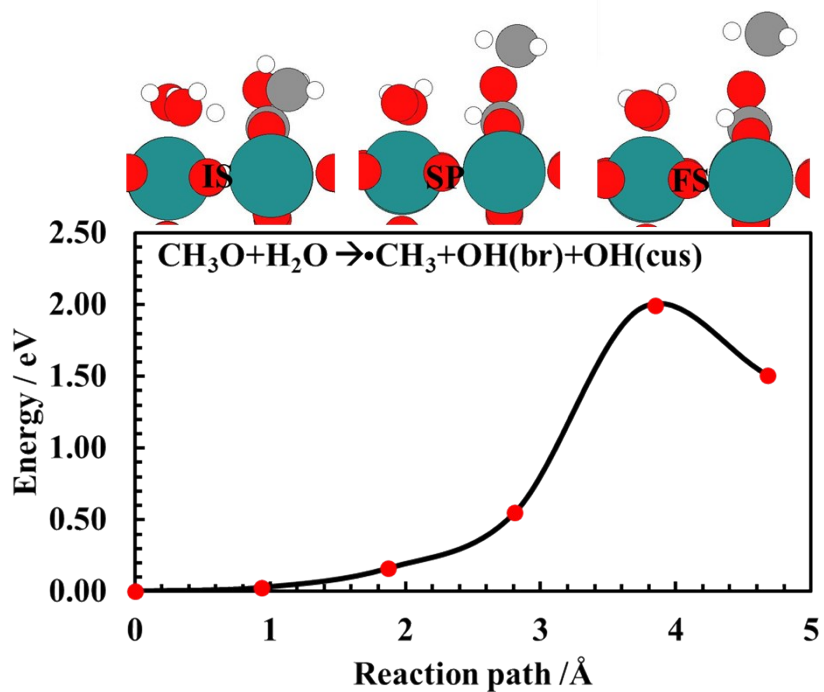

Figure S21. DFT calculated barrier for  $\text{CH}_3\text{O}$  protonation to  $\bullet\text{CH}_3 + \text{OH}(\text{br}) + \text{OH}(\text{cus})$  on  $\text{RuO}_2(110)$  surface. (IS) initial state, (SP) saddle point and (FS) final state are shown on the top of the figure.

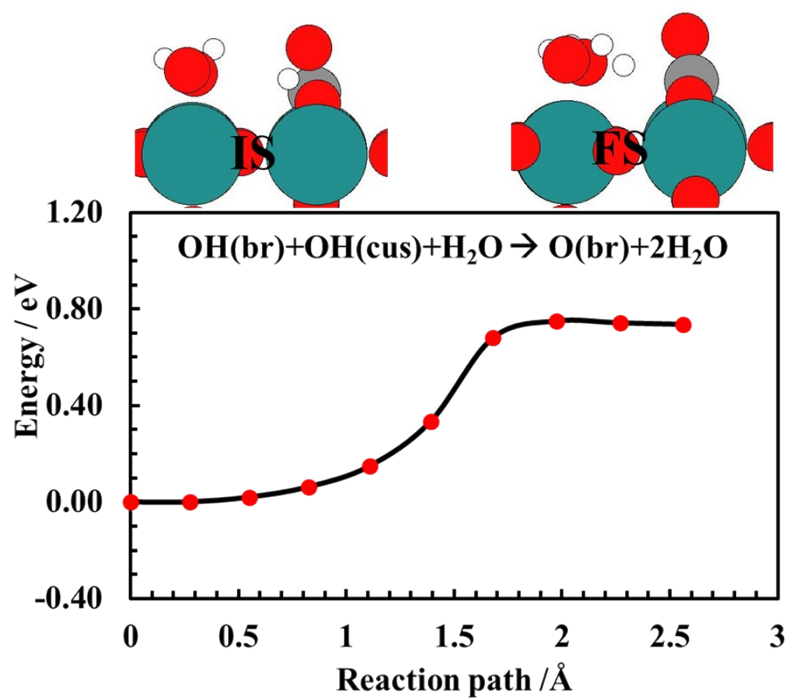

Figure S22. DFT calculated barrier for OH (br) reconfiguration to O(br) on RuO<sub>2</sub>(110) surface. (IS) initial state, and (FS) final state are shown on the top of the figure.

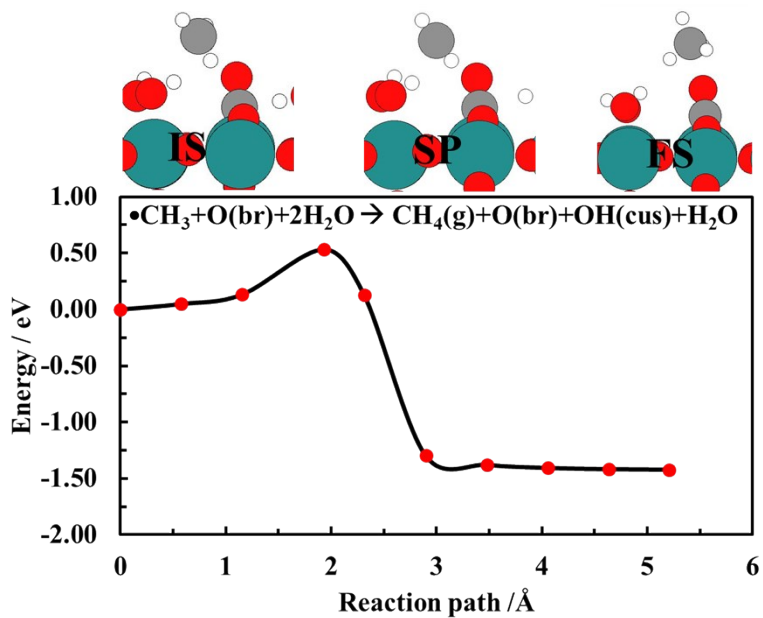

Figure S23. DFT calculated barrier for •CH<sub>3</sub> protonation to CH<sub>4</sub>(g) on RuO<sub>2</sub>(110) surface. (IS) initial state, (SP) saddle point and (FS) final state are shown on the top of the figure.

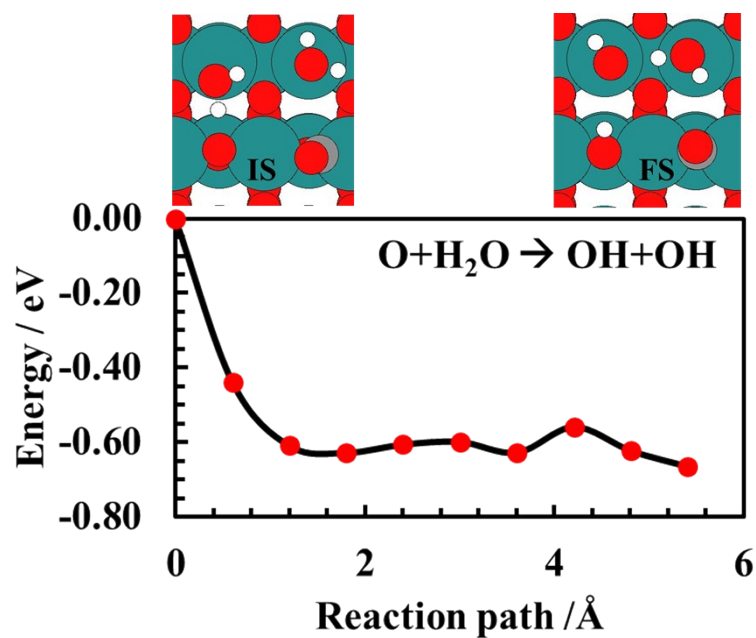

Figure S24. DFT calculations for O protonation to OH on RuO<sub>2</sub>(110) surface. (IS) initial state and (FS) final state are shown on the top of the figure.

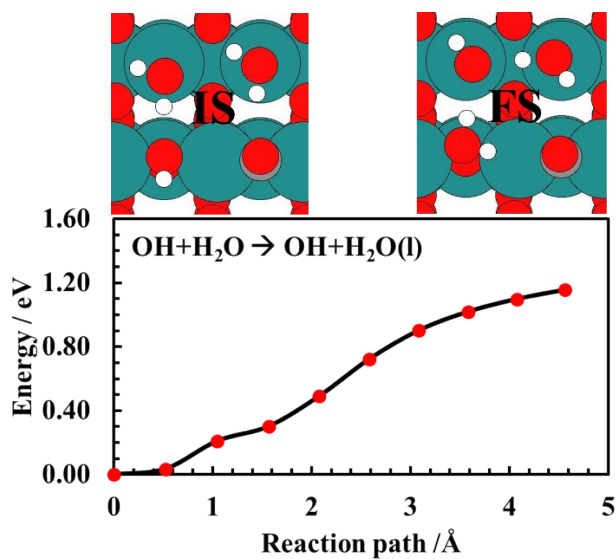

Figure S25. DFT calculations for OH protonation to H<sub>2</sub>O(l) on RuO<sub>2</sub>(110) surface. (IS) initial state and (FS) final state are shown on the top of the figure.

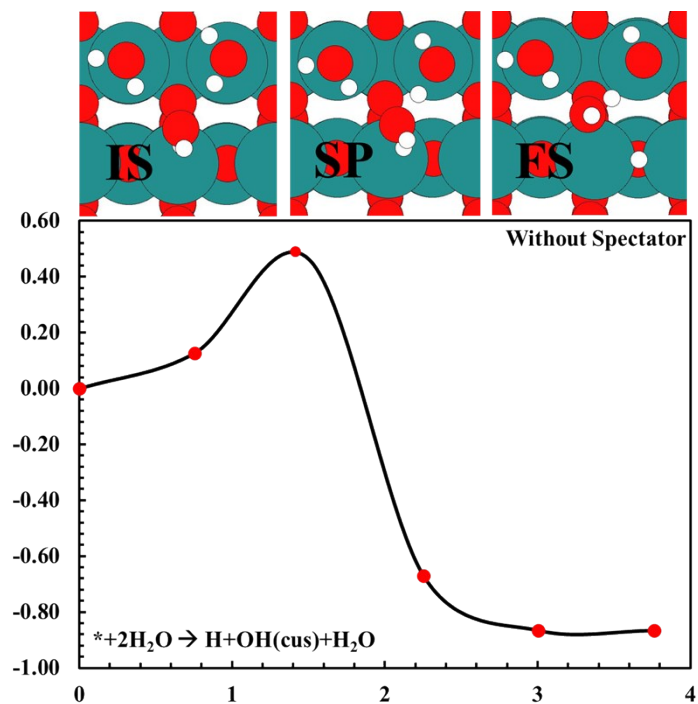

Figure S26. DFT calculations for transferring H to vacant bridge site on RuO<sub>2</sub>(110) surface. (IS) initial state, (SP) saddle point and (FS) final state are shown on the top of the figure.

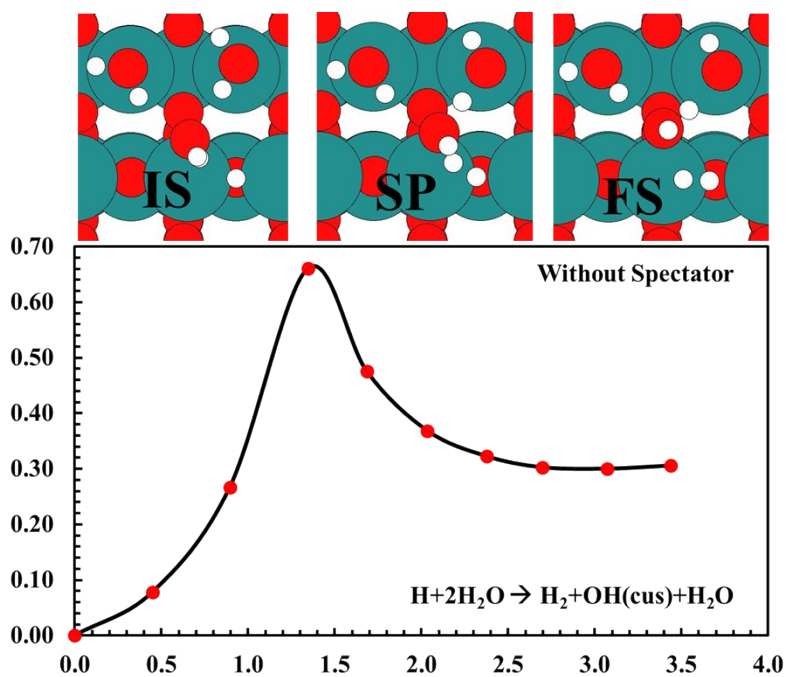

Figure S27. DFT calculations for H protonation to H<sub>2</sub> on RuO<sub>2</sub>(110) surface. (IS) initial state, (SP) saddle point and (FS) final state are shown on the top of the figure.



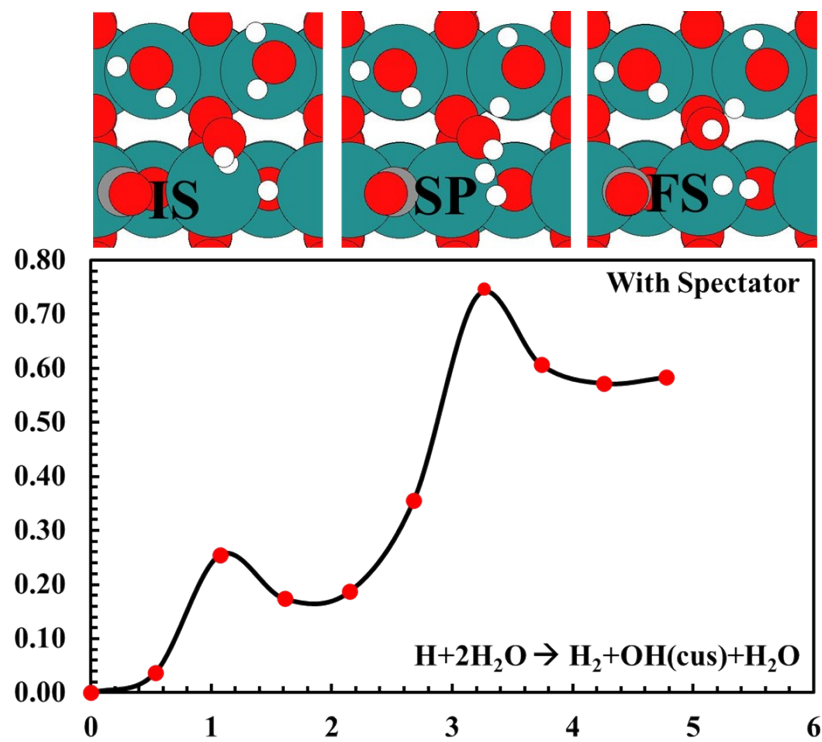

Figure S28. DFT calculations for H protonation to H<sub>2</sub> on RuO<sub>2</sub>(110) surface where CO is spectator. (IS) initial state, (SP) saddle point and (FS) final state are shown on the top of the figure.

## References

- 1 A. Bandi, *J. Electrochem. Soc.*, 1990, **137**, 2157.
- 2 A. Bandi, *J. Electrochem. Soc.*, 1992, **139**, 1605.
- 3 J. P. Popić, M. L. Avramov-Ivić and N. B. Vuković, *J. Electroanal. Chem.*, 1997, **421**, 105–110.
- 4 N. Spataru, K. Tokuhira, C. Terashima, T. N. Rao and A. Fujishima, *J. Appl. Electrochem.*, 2003, **33**, 1205–1210.
- 5 Qu, J., Zhang, X., Wang, Y. & Xie, C. *Electrochim. Acta* **50**, 3576–3580 (2005).
- 6 S. Mezzavilla, Y. Katayama, R. Rao, J. Hwang, A. Regoutz, Y. Shao-Horn, I. Chorkendorff and I. E. L. Stephens, *J. Phys. Chem. C*, 2019, **123**, 17765–17773.
